# Supplementary material for: A Tetraperylene Diimides Based 3D Nonfullerene Acceptor for Efficient Organic Photovoltaics
Source: PubMed Central journal article supplement (PMC5115352; doi:10.1002/advs.201500014), 2015-02-27
Supplement: ADVS-2-0e-s001.pdf [file ADVS-2-0e-s001.pdf]

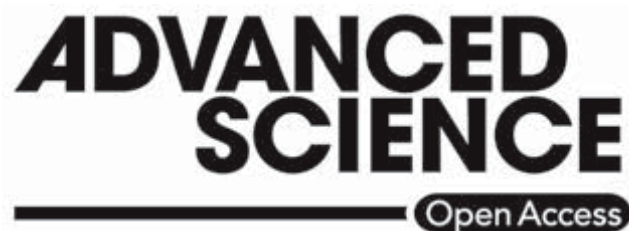

## Supporting Information

for *Adv. Sci.*, DOI: 10.1002/advs.201500014

A Tetraperylene Diimides Based 3D Nonfullerene Acceptor  
for Efficient Organic Photovoltaics

*Shi-Yong Liu, Chen-Hao Wu, Chang-Zhi Li, Sheng-Qiang Liu,  
Kung-Hwa Wei, Hong-Zheng Chen,\* and Alex K.-Y. Jen\**

## Supporting Information

### **A Tetra Perylene Diimide Based Three-Dimensional Non-Fullerene Acceptor for Efficient Organic Photovoltaics**

*Shi-Yong Liu, Chen-Hao Wu, Chang-Zhi Li, Sheng-Qiang Liu, Kung-Hwa Wei, Hong-Zheng Chen,\* and Alex K.-Y. Jen\**

#### **Contents**

|                                                                                                |     |
|------------------------------------------------------------------------------------------------|-----|
| 1. Instruments, Materials and Experiments.....                                                 | S2  |
| 2. <b>Figure S1</b> (Structures of planar PDI monomer to 3D tetramer).....                     | S5  |
| 3. <b>Figure S2</b> (Structural comparison between tetra-Ph-silane and tetra-Ph-methane).....  | S6  |
| 4. <b>Scheme S1</b> (Synthesis of intermediate <b>1</b> ).....                                 | S6  |
| 5. <b>Scheme S2</b> (Synthesis of intermediate <b>2</b> ).....                                 | S6  |
| 6. <b>Figure S3, S4</b> ( $^1\text{H}$ & $^{13}\text{C}$ NMR signals of N-alkyl chains).....   | S7  |
| 7. <b>Figure S5</b> (PL decay spectra of Tetra-PDI and Mono-PDI in solutions & films).....     | S8  |
| 8. <b>Figure S6</b> (Structure of PBDTT-F-TT and frontier energy level chart).....             | S8  |
| 9. <b>Figure S7</b> (Configuration chart for the OPVs in this study) .....                     | S9  |
| 10. <b>Figures S8, S9, and Tables S1, S2</b> (Ratio and additive optimization for OPVs) .....  | S9  |
| 11. <b>Figures S10</b> (Uv-vis and PL of neat & blend films of Mono-PDI and PBDTT-F-TT)....    | S10 |
| 12. <b>Figures S11, S12 and Table S3</b> (OFET and SCLC curves and values) .....               | S11 |
| 13. <b>Figures S13-S20</b> ( $^1\text{H}$ & $^{13}\text{C}$ NMR and MALDI-TOF MS spectra)..... | S12 |
| 14. <b>References</b> .....                                                                    | S15 |

## Instruments, Materials and Experiments.

All  $^1\text{H}$  and  $^{13}\text{C}$  NMR spectra were obtained in chloroform-*d*, with Bruker 300, and Bruker Avance DRX-499.  $^{13}\text{C}$  NMR (126 MHz) spectra were measured with a proton-decoupling pulse program. Chemical shifts for  $^1\text{H}$  and  $^{13}\text{C}$  NMR were referenced to residual signals from  $\text{CDCl}_3$  ( $^1\text{H}$  NMR  $\delta = 7.26$  ppm and  $^{13}\text{C}$  NMR  $\delta = 77.23$  ppm). Matrix-assisted laser desorption-ionization time of flight mass spectrometry (MALDI-TOF MS) was performed on a Bruker Autoflex II. Samples were prepared by diluting the molecules in  $\text{CH}_2\text{Cl}_2$  with the matrix. Differential scanning calorimetry (DSC) were measured on a WCT-2 thermal balance. UV-vis spectra were recorded with a Jasco V-670. PL spectra were measured on Fluoroskan Ascent FL. Time-resolved PL spectra were test on FluoTime 100 Fluorescence Lifetime Spectrometer, excited by laser wavelength of 470 nm. Cyclic voltammetry (CV) was done on a CHI 660C electrochemical workstation with Pt disk, Pt plate, and standard 10 calomel electrode (SCE) as working electrode, counter electrode, and reference electrode, respectively, in a  $0.1 \text{ mol L}^{-1}$  tetrabutylammonium hexafluorophosphate ( $\text{Bu}_4\text{NPF}_6$ )  $\text{CH}_2\text{Cl}_2$  solution. Theoretical calculations based on density functional methods have been performed for Tetra-PDI and Mono-PDI with Gaussian09 program. Becke's three-parameter gradient-corrected functional (B3LYP) with 6-31G(d,p) basis was used to optimize the geometry.<sup>[S1]</sup> The current-voltage (*J-V*) curves were measured with Keithley 2400 measurement source units at room temperature in air. The photocurrent was measured under a calibrated solar simulator (Abet 300 W) at  $100 \text{ mW cm}^{-2}$ .

**CV was tested on a CHI 660C** electrochemical workstation with Pt disk, Pt plate, and standard 10 calomel electrode (SCE) as working electrode, counter electrode, and reference electrode, respectively, in a  $0.1 \text{ mol L}^{-1}$  tetrabutylammonium hexafluorophosphate ( $\text{Bu}_4\text{NPF}_6$ )  $\text{CH}_2\text{Cl}_2$  solution.

**OPV device characterizations:** The J-V characteristics of devices under an AM 1.5 G illumination of  $100 \text{ mW cm}^{-2}$  were measured by using a Keithley 2400 source-measure unit in a nitrogen-filled glove box. Devices were measured without any shadow masking. The AM 1.5 G illumination was simulated by using an Oriel 300 W Solar Simulator and calibrated by using a silicon photodiode with a protective KG5 filter calibrated by the National Renewable Energy Laboratory (NREL).

**The EQE system uses a lock-in amplifier** (Stanford Research Systems SR830) to record the short circuit current under chopped monochromatic light.

**AFM images were obtained by** a NanoScope IIIa (Digital instrument Inc.) operating in the tapping mode.

**PBDTT-F-TT is commercially** available from 1-Material, Inc as trade name of PCE-10. Unless otherwise specified, chemicals and solvents were purchased from Aldrich.

**OFET Device Fabrication and Testing.** Bottom-gate bottom-contact devices were fabricated in a nitrogen glovebox by spin-coating 5 mg/mL DCB semiconductor solutions filtered through  $0.45 \mu\text{m}$  PTFE filters with thermally evaporated silver source/drain electrodes ( $\sim 120 \text{ nm}$  thick) on a benzocyclobutene (BCB) coated silicon substrate (with 300 nm silicon oxide on top). The BCB dielectric layer was spin coated at 4000 rpm and baked at  $250 \text{ }^\circ\text{C}$  for overnight. The active layer was spin coated at 1000 rpm and baked at  $110^\circ\text{C}$  for 10 min. Last, the device structure was completed by thermal deposition of the Ag gate electrode. All three PDI-based devices were tested under nitrogen atmosphere.

**SCLC Mobility Measurements:** Space charge-limited currents were tested in electron-only devices with a configuration of ITO/ZnO/PBDTT-F-TT:PDI acceptors/Ca (20 nm)/Al (130 nm) and hole-only devices with a configuration of ITO/PEDOT:PSS/PBDTT-F-TT:PDI acceptor/MoO<sub>3</sub>/Ag. The devices were prepared using the above-mentioned procedure. In hole-only devices, PEDOT:PSS (Clevios\_ P VP AI 4083) was spin-coated on ITO substrates at

5000 rpm for 30 sec and then annealed at 140 °C for 10 min. The mobilities were determined by fitting the dark current according to the following equation:

$$J(V) = \frac{9V^2}{8L^3} \varepsilon_0 \varepsilon_r \mu_0 e^{(0.89\gamma \sqrt{V/L})}$$

Where  $J$  is the dark current density ( $\text{mA cm}^{-2}$ ),  $\mu_0$  is the zero-field mobility ( $\text{cm}^2/\text{V sec}$ ),  $\varepsilon_0$  is the permittivity of free space ( $88.54 \times 10^{-12} \text{ mA sec/V sec}$ ),  $\varepsilon_r$  is the relative permittivity of the material (3),  $V$  is the effective voltage ( $V = V_{\text{Applied}} - V_{\text{Built-in}} - V_{\text{series resistance}}$ ), and  $L$  is the thickness of the active layer.

### Synthesis of Intermediates:

Scheme S1 shows the synthetic route of intermediate compound 1 according to the reported procedure.<sup>[S2-S4]</sup> Scheme S2 shows the synthetic route of intermediate compound 2. Based on the reported procedure with slight modifications,<sup>[S5]</sup> detailed procedures are as follows. A solution of 1,4-dibromobenzene (11.8 g, 50 mmol) in anhydrous ether (125 mL) was stirred at  $-10^\circ\text{C}$  under argon and treated dropwise with a solution of butyllithium (20 mL, 2.5 M in hexane, 50 mmol). The resulting mixture was kept at  $-10^\circ\text{C}$  for 15 min, and then  $\text{SiCl}_4$  (1.43 mL, 12.5 mmol) was added dropwise. The mixture was stirred at  $-10^\circ\text{C}$  for 30 min and at  $25^\circ\text{C}$  for 12 h. Then 1 M aqueous HCl was added, and the resulting mixture was extracted with ether. The combined extracts were washed with  $\text{H}_2\text{O}$  and brine, dried over  $\text{MgSO}_4$ , and filtered. Volatiles were removed by evaporation under reduced pressure, and the residue was recrystallized twice from ethanol to afford colorless crystal of tetrakis(4-bromophenyl)silane.  $^1\text{H NMR}$  (300 MHz,  $\text{CDCl}_3$ )  $\delta$  7.62–7.51 (d,  $J = 8.4$ , 8H), 7.42–7.32 (d,  $J = 8.4$ , 8H).

A solution of the above obtained tetrakis(4-bromophenyl)silane (1.3 mg, 2.00 mmol) in anhydrous THF (120 mL) was stirred at  $-78^\circ\text{C}$  under argon and treated dropwise with a solution of butyllithium (6.40 mL, 2.5 M in hexane, 16 mmol). The resulting mixture was kept at  $-78^\circ\text{C}$  for 30 min, and then 2-isopropoxy-4,4,5,5-tetramethyl-1,3,2-dioxaborolane (32

mmol) was added dropwise. The mixture was stirred overnight while the temperature was allowed to rise to 25°C. Then 100 mL water was added, and the resulting mixture was extracted with ether. The combined extracts were washed brine, dried over MgSO<sub>4</sub>, and filtered. Volatiles were removed by evaporation under reduced pressure, and the residue was recrystallized twice from ethyl acetate/ethanol to afford white solid compound **2**. <sup>1</sup>H NMR (300 MHz, CDCl<sub>3</sub>) δ 7.80 (dd, *J* = 8.0, 2.8 Hz, 8H), 7.61 –7.52 (d, 8H), 1.36 (s, 48H).

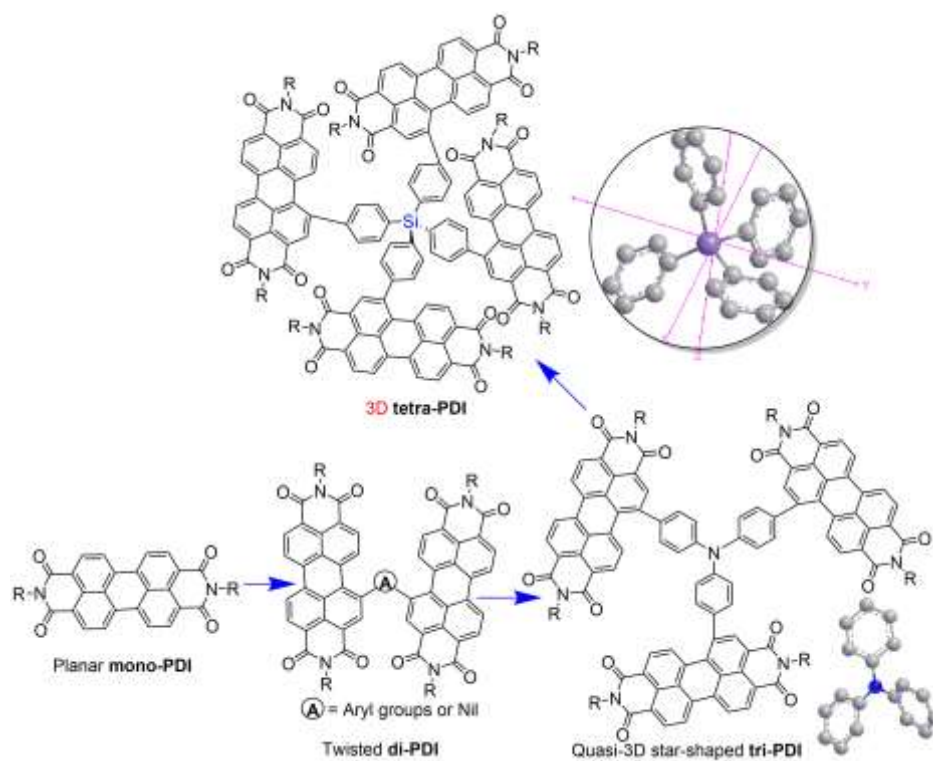

**Figure S1.** PDI: from planar monomer,<sup>[4]</sup> twist dimer,<sup>[5]</sup> pseudo-3D trimer to 3D tetramer.<sup>[6]</sup>

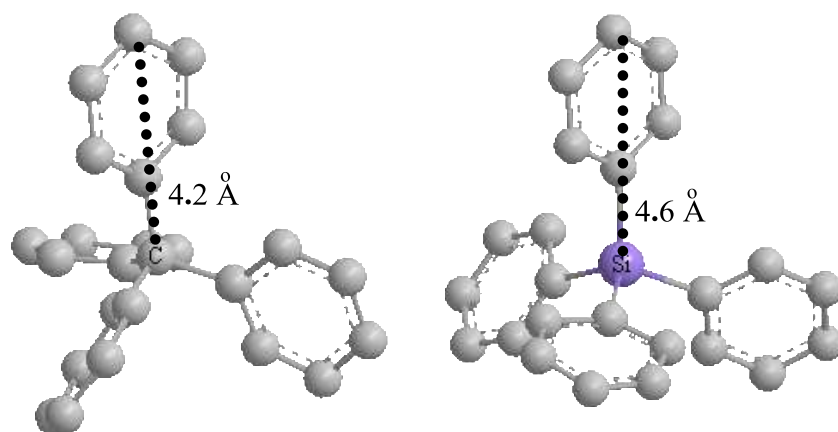

**Figure S2.** Tetra-Ph-silane has a much larger volume than tetra-Ph-methane, because of  $V = 4/3\pi R^3$ ,  $V_{\text{tetra-Ph-methane}}/V_{\text{tetra-Ph-silane}} = (4.6/4.2)^3 = 1.31$ .

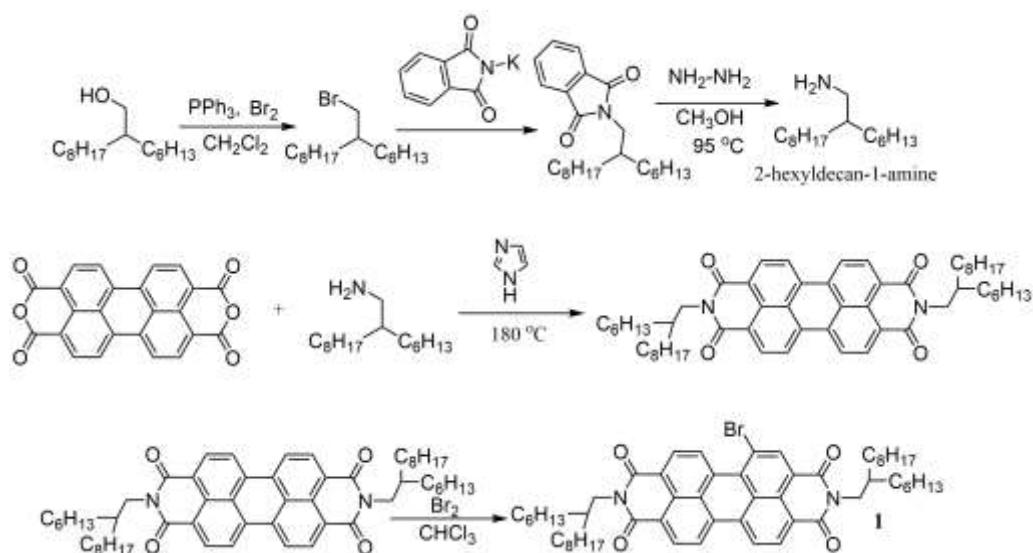

**Scheme S1.** Synthesis of **1**.<sup>[S2-S4]</sup>

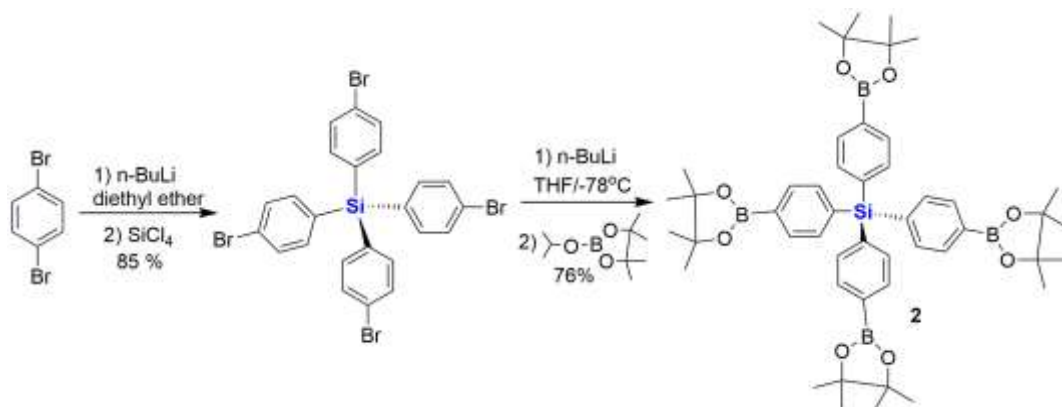

**Scheme S2.** Synthesis of **2**.<sup>[S5]</sup>

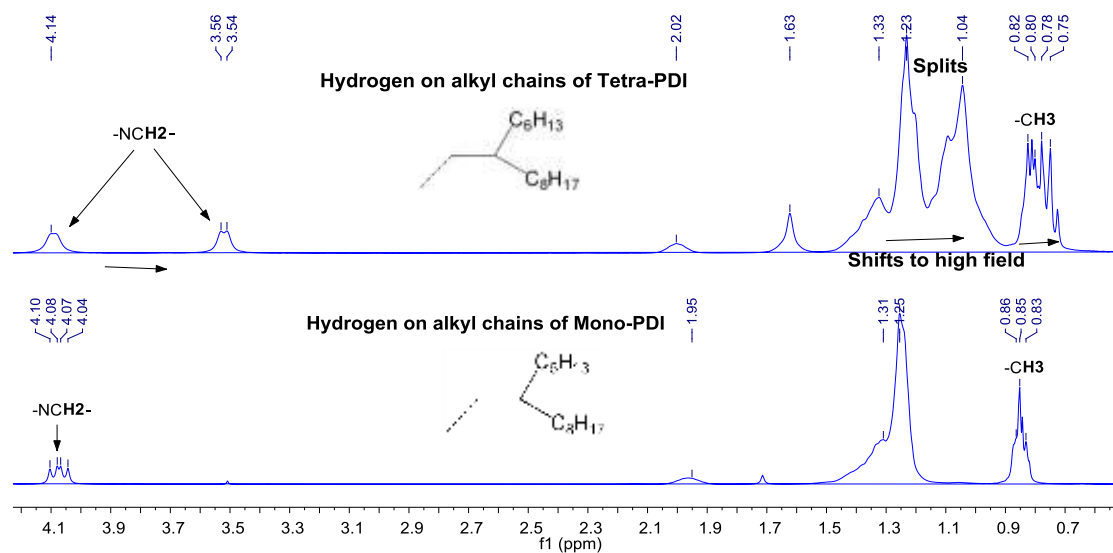

Figure S3.  $^1\text{H}$  NMR signals of N-alkyl chains.

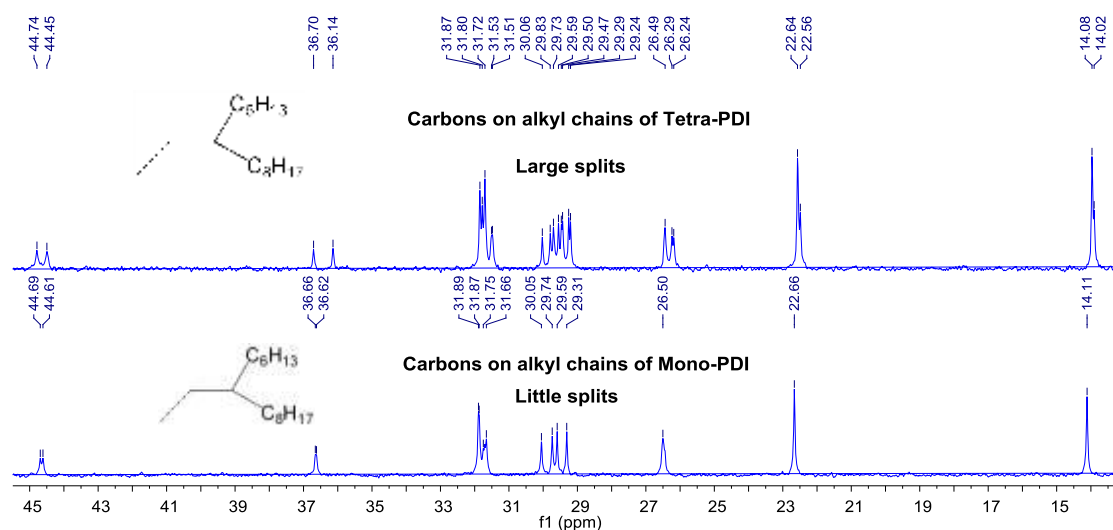

Figure S4.  $^{13}\text{C}$  NMR signals of N-alkyl chains.



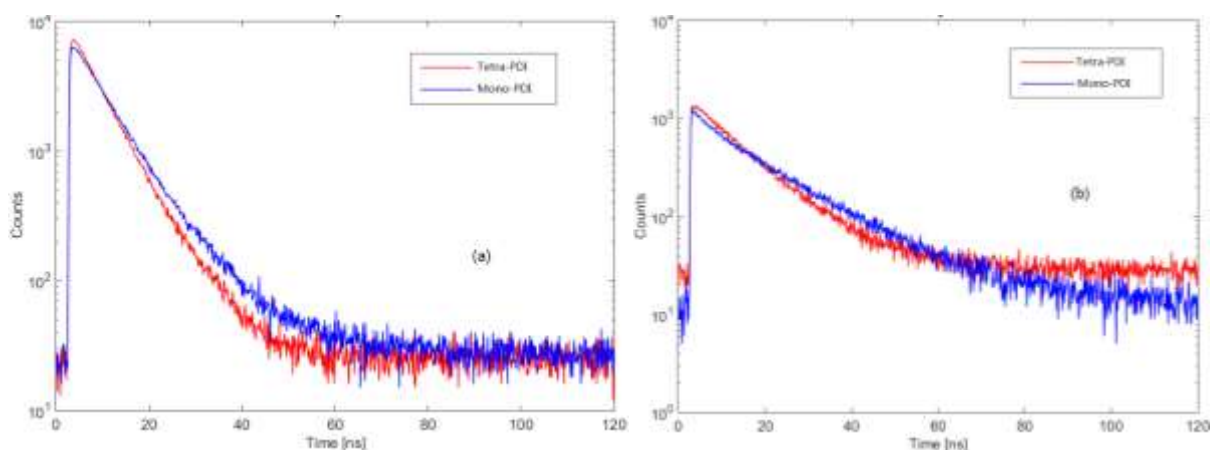

**Figure S5.** Time-resolved fluorescence spectra of Tetra-PDI and Mono-PDI (a) in  $\text{CH}_2\text{Cl}_2$  solution and (b) in film, excited by laser wavelength of 470 nm.

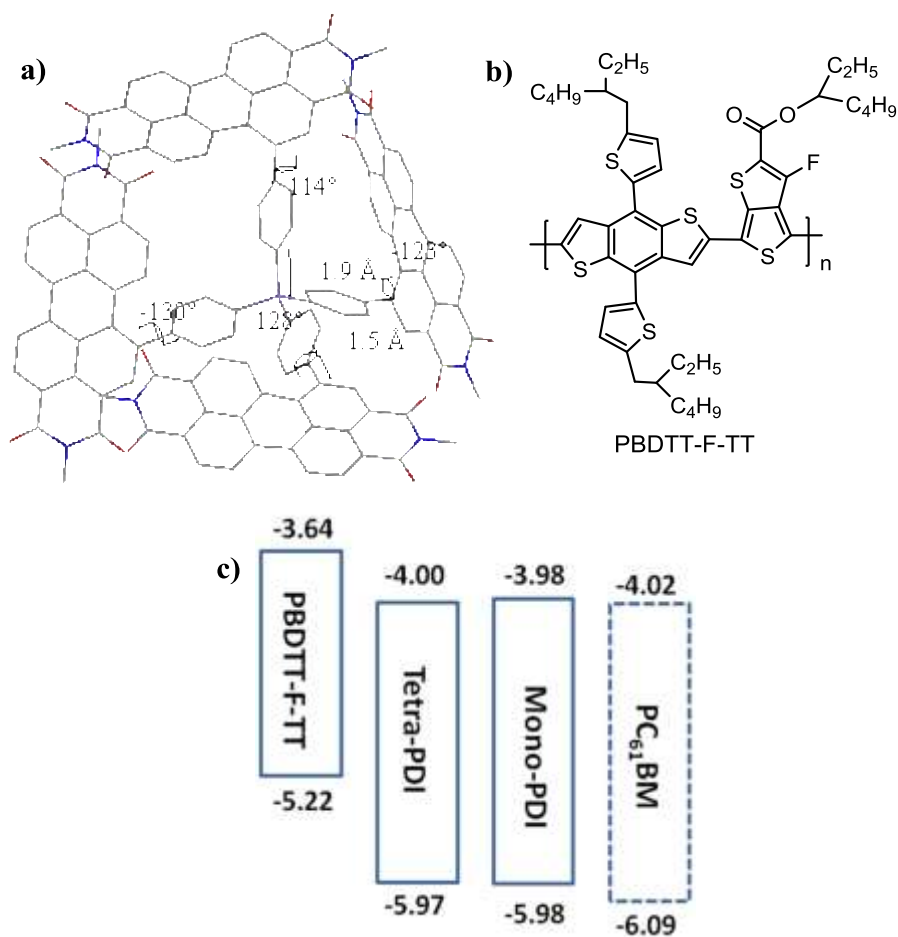

**Figure S6.** (a) Optimized geometry of Tetra-PDI obtained by DFT shown as cylindrical model; (b) Structure of PBDTT-F-TT; (c) Frontier energy levels of PBDTT-F-TT, Tetra-PDI, Mono-PDI and  $\text{PC}_{61}\text{BM}$ .

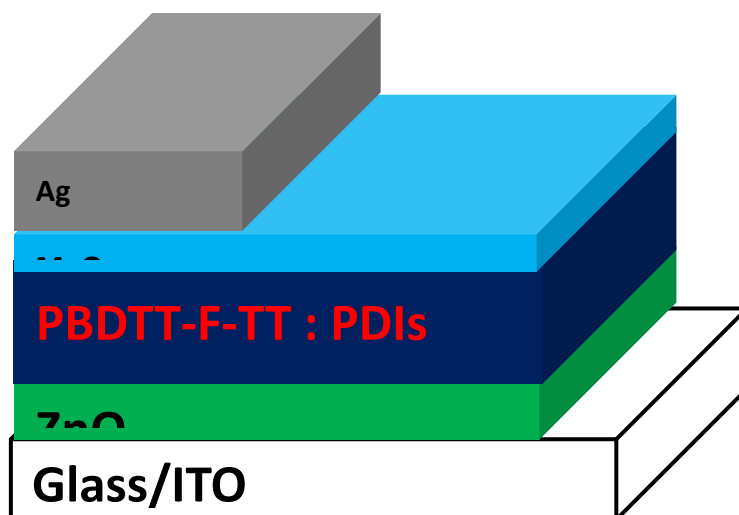

**Figure S7.** Configuration of invert device for OPVs in this study.

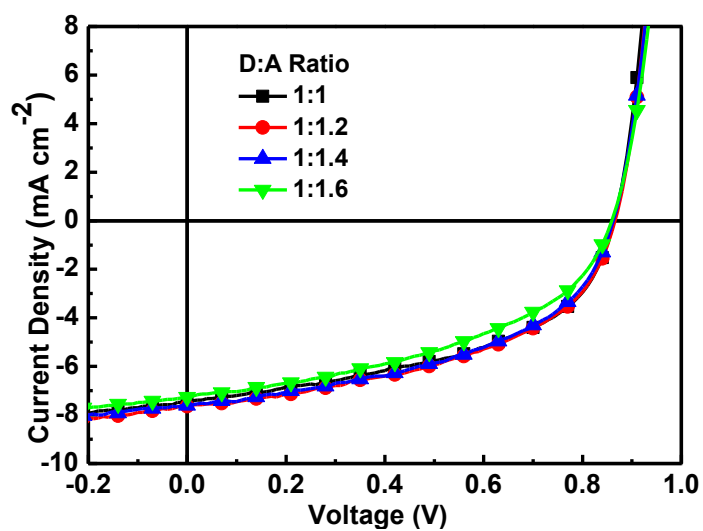

**Figure S8.** J-V curves of PBDTT-F-TT:Tetra-PDI with various D:A ratios.

**Table S1.** Effects of D:A ration on the OPV performance of PBDTT-F-TT:Tetra-PDI.

| D:A   | $V_{oc}$ [V] | $J_{sc}$ [ $\text{mA cm}^{-2}$ ] | FF   | PCE [%] |
|-------|--------------|----------------------------------|------|---------|
| 1:1   | 0.86         | 7.51                             | 0.48 | 3.15    |
| 1:1.2 | 0.87         | 7.66                             | 0.48 | 3.21    |
| 1:1.4 | 0.86         | 7.61                             | 0.48 | 3.14    |
| 1:1.6 | 0.86         | 7.25                             | 0.45 | 2.80    |

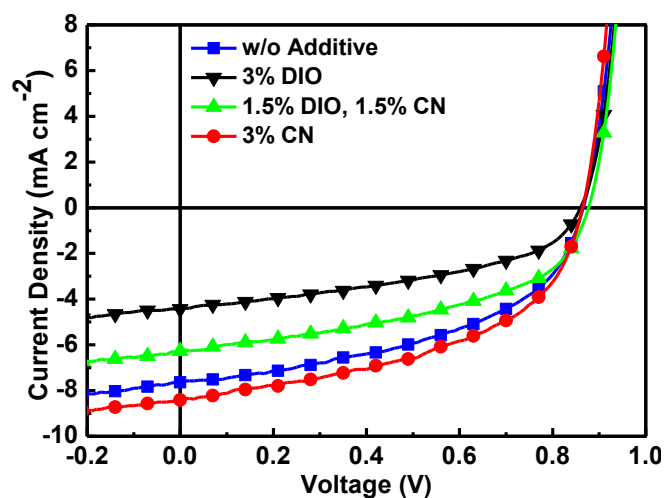

Figure S9. J-V curves of PBDTT-F-TT:Tetra-PDI with DIO and CN additives

Table S2. Effects of additives on the OPV performance of PBDTT-F-TT:Tetra-PDI

| Additive             | $V_{oc}$ [V] | $J_{sc}$ [ $\text{mA cm}^{-2}$ ] | FF   | PCE [%] |
|----------------------|--------------|----------------------------------|------|---------|
| No                   | 0.87         | 7.66                             | 0.48 | 3.21    |
| 3% DIO               | 0.86         | 4.42                             | 0.44 | 1.68    |
| 1.5% DIO,<br>1.5% CN | 0.88         | 6.27                             | 0.47 | 2.58    |
| 3% CN                | 0.86         | 8.42                             | 0.49 | 3.54    |

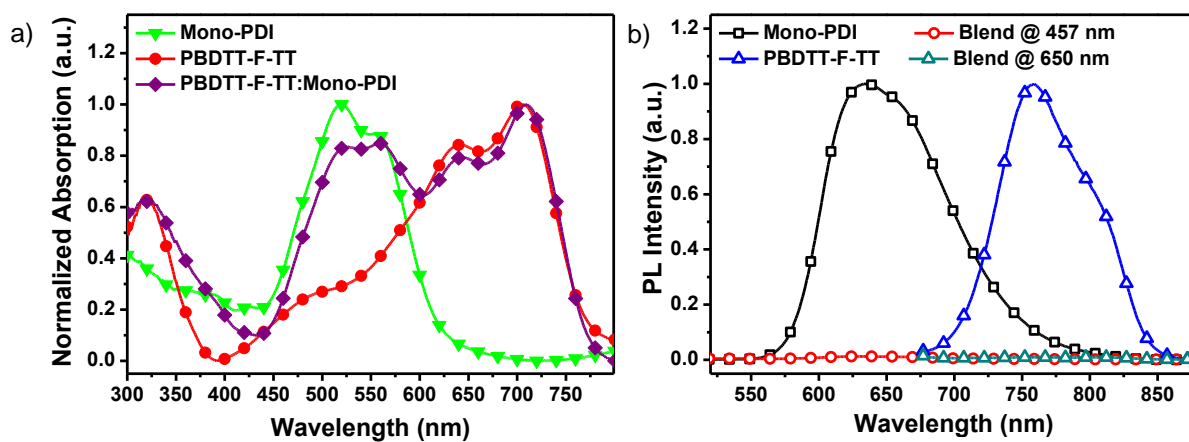

**Figure S10.** a) UV-vis spectra of neat films of Mono-PDI and PBDTT-F-TT, and their blend film; b) Steady PL spectra of Mono-PDI (excited at 457 nm), PBDTT-F-TT (excited at 650 nm), and PBDTT-F-TT:Mono-PDI (1:1.2, w/w) (excited at 457 and 650 nm).

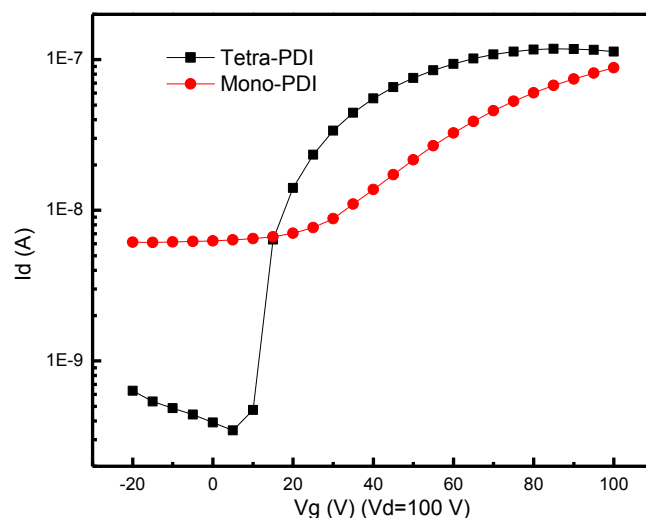

**Figure S11.** FET characteristic of the Tetra-PDI film.

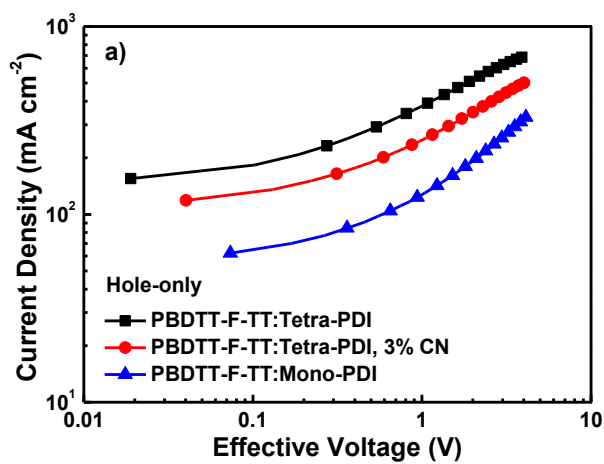

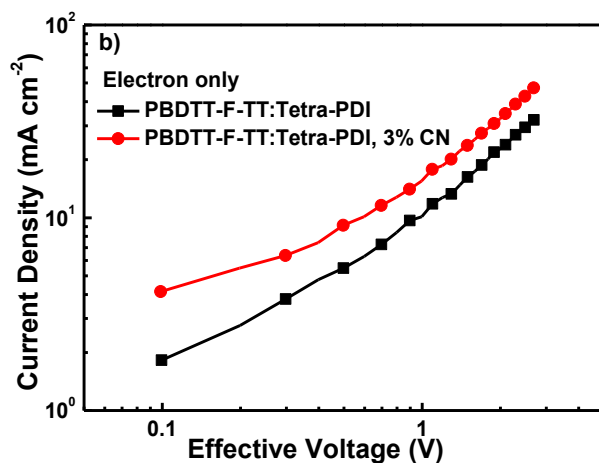

**Figure S12.** J-V curves for a) hole-only and b) electron-only devices.

**Table S3.** Hole and electron mobilities for PBDTT-F-TT:Mono-PDI, PBDTT-F-TT:Tetra-PDI, and PBDTT-F-TT:Tetra-PDI, 3% CN devices

| D:A                            | $\mu_h$ [ $\text{cm}^2 \text{V}^{-1} \text{S}^{-1}$ ] | $\mu_e$ [ $\text{cm}^2 \text{V}^{-1} \text{S}^{-1}$ ] |
|--------------------------------|-------------------------------------------------------|-------------------------------------------------------|
| PBDTT-F-TT:Mono-PDI            | $6.86 \times 10^{-4}$                                 | -                                                     |
| PBDTT-F-TT:Tetra-PDI           | $3.47 \times 10^{-3}$                                 | $6.02 \times 10^{-5}$                                 |
| PBDTT-F-TT:Tetra-PDI,<br>3% CN | $1.88 \times 10^{-3}$                                 | $8.66 \times 10^{-5}$                                 |

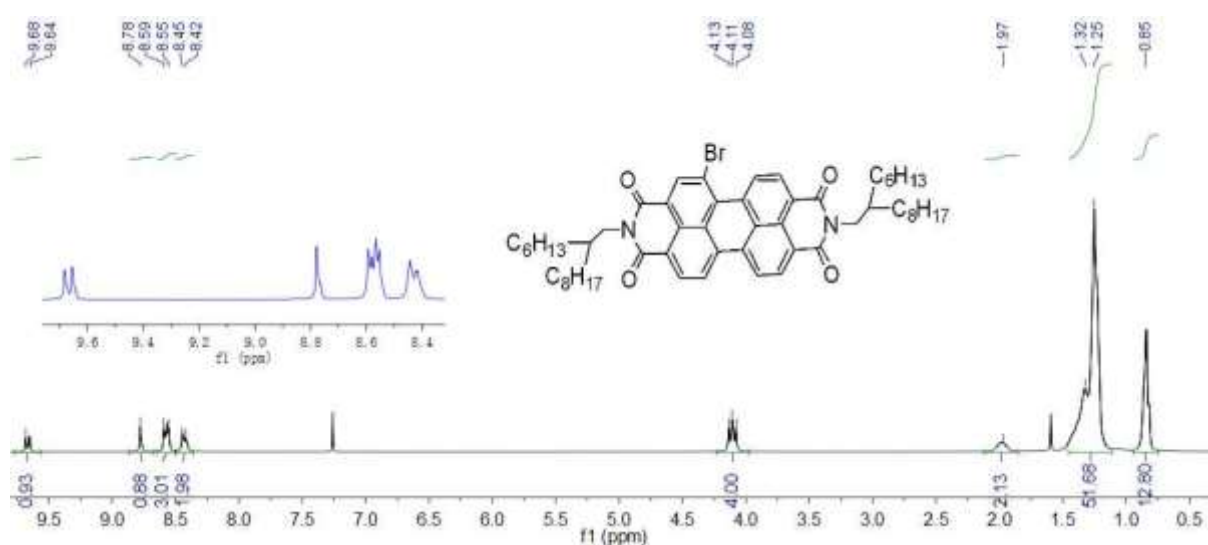

**Figure S13.**  $^1\text{H}$  NMR of intermediate 1.

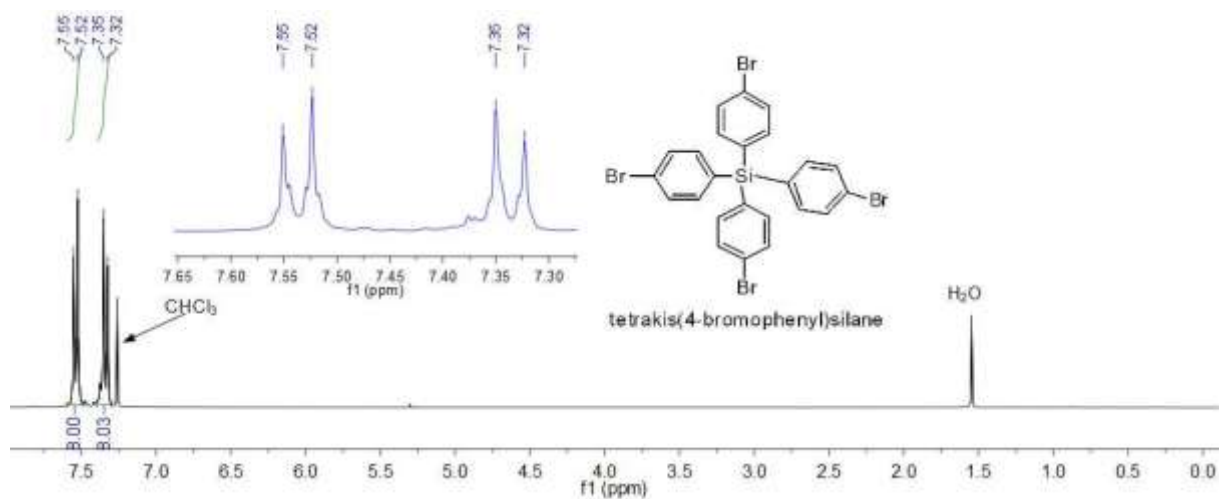

**Figure S14.**  $^1\text{H}$  NMR of tetrakis(4-bromophenyl)silane.

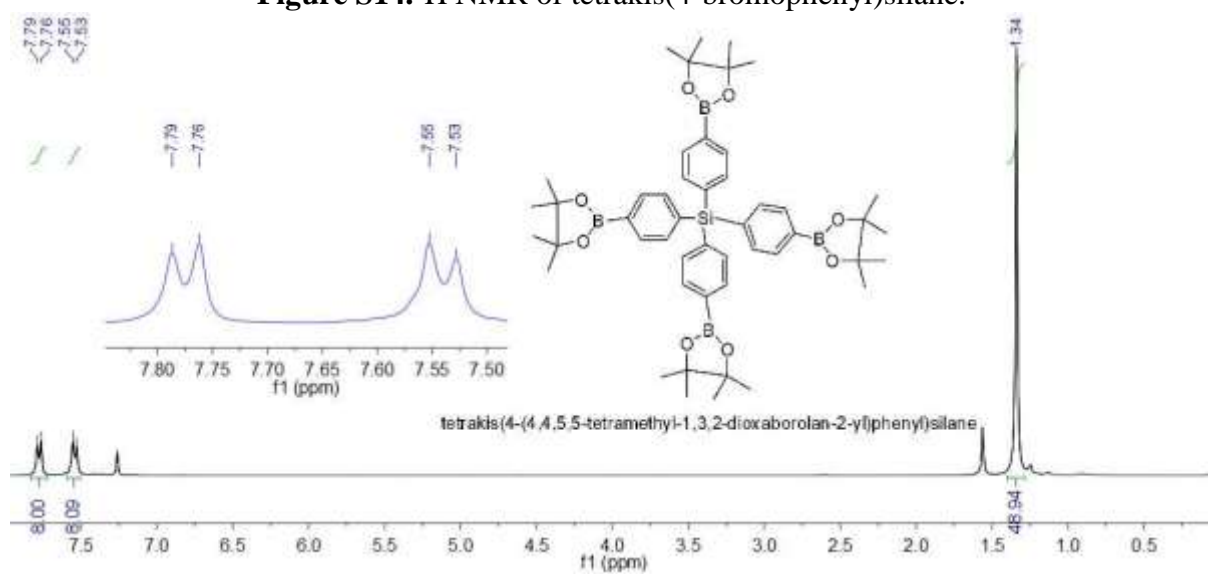

**Figure S15.**  $^1\text{H}$  NMR of intermediate 2.

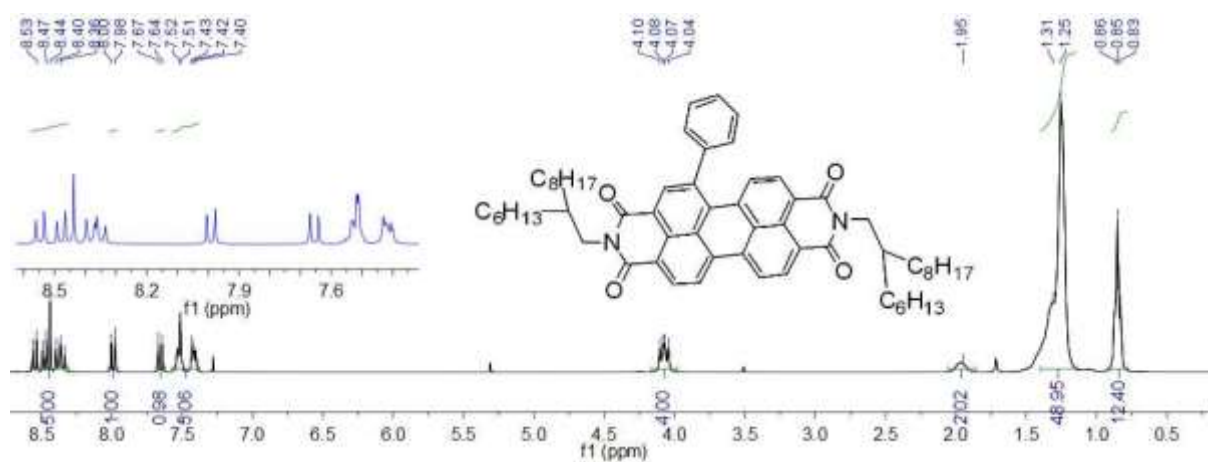

**Figure S16. <sup>1</sup>H NMR of Mono-PDI.**

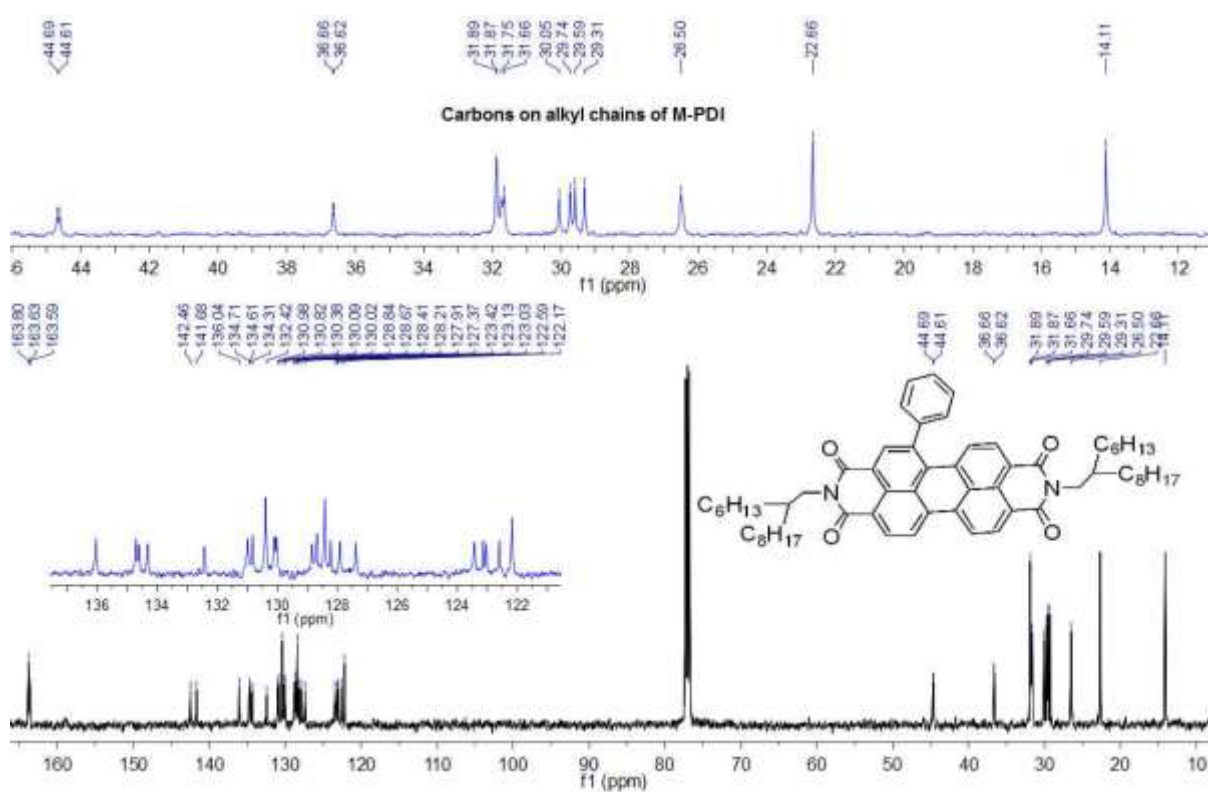

**Figure S17. <sup>13</sup>C NMR of Mono-PDI.**

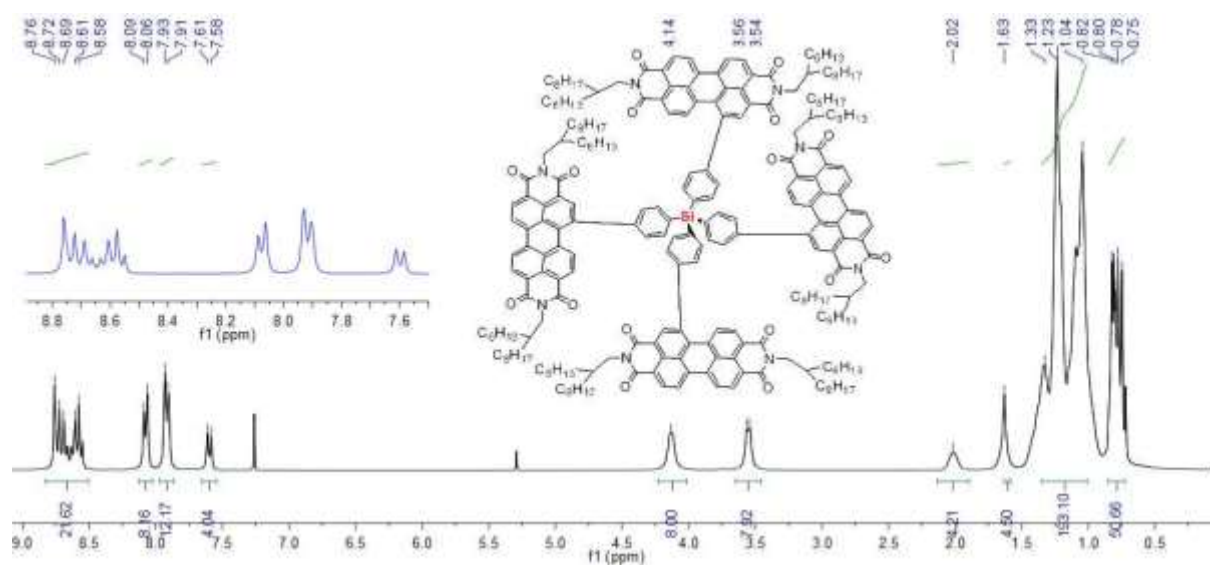

Figure S18.  $^1\text{H}$  NMR of Tetra-PDI.

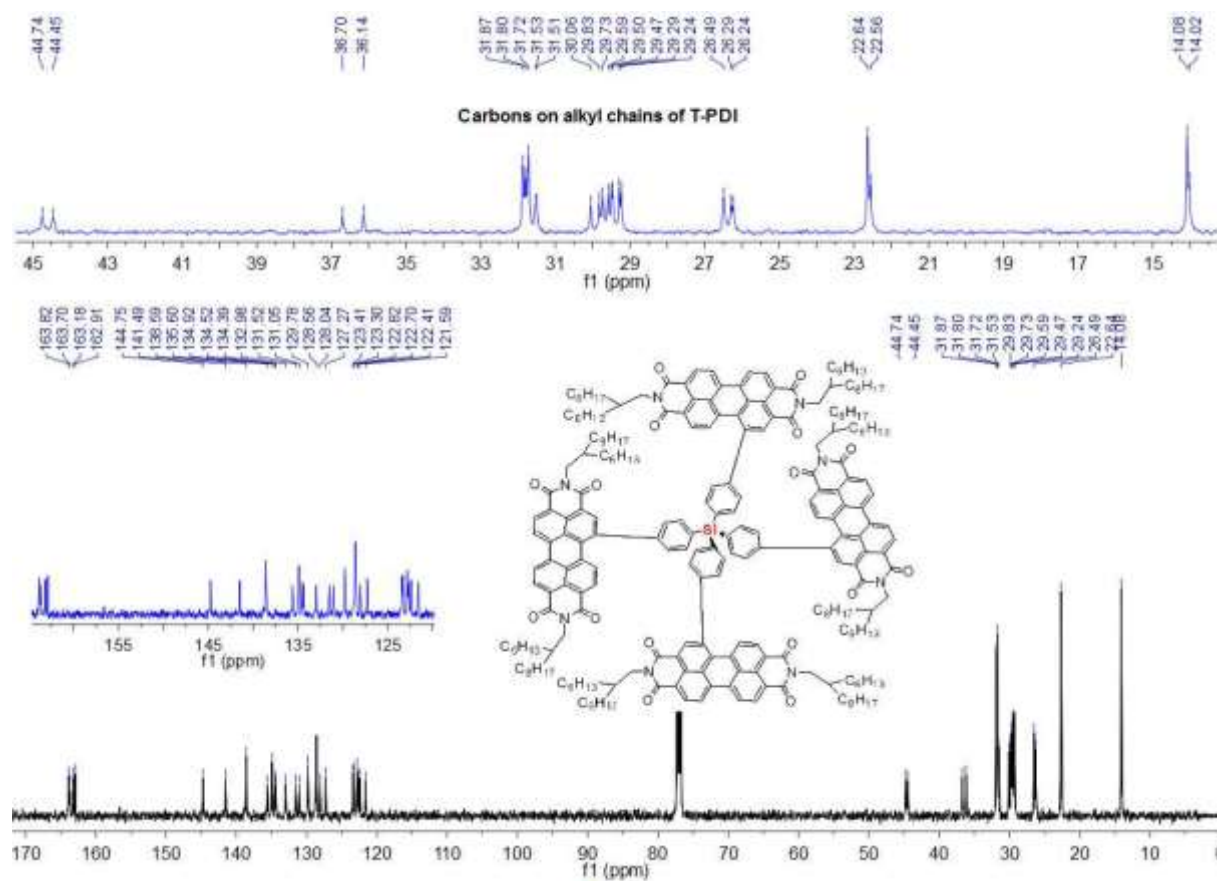

Figure S19.  $^{13}\text{C}$  NMR of Tetra-PDI.



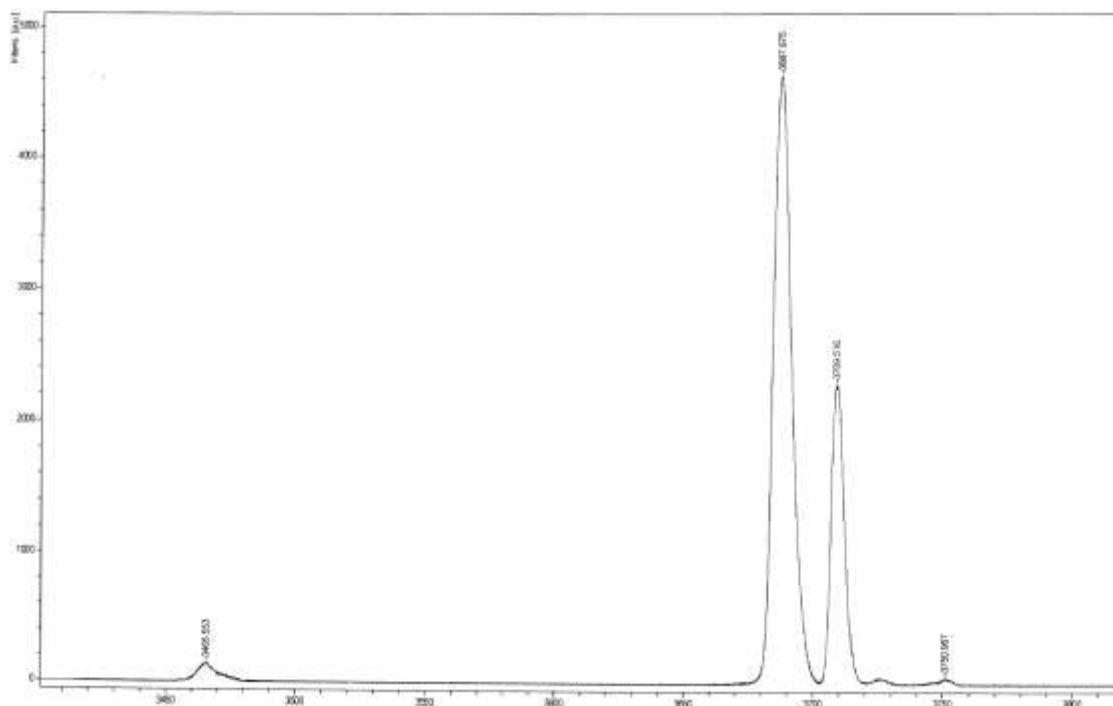

**Figure S20.** MALDI-TOF MS spectrum of Tetra-PDI.

### References

- [S1] M. J. Frisch, *et al.* *Gaussian, Inc., Wallingford CT*, **2009**.
- [S2] J.-H. Fournier, X. Wang, J. D. Wuest, *Can. J. Chem.*, **2003**, *81*, 376.
- [S3] X. Guo, M. D. Watson, *Org. Lett.*, **2008**, *10*, 5333.
- [S4] Z. Chen, B. Fimmela, F. Würthner, *Org. Biomol. Chem.*, **2012**, *10*, 5845.
- [S5] P. Rajasingh, R. Cohen, E. Shirman, L. J. W. Shimon, B. Rytchinski, *J. Org. Chem.*, **2007**, *72*, 5973.
